# Supplementary material for: Dual-Electrode Configuration for Enhanced Plasma Activated Water Production: Optimizing RONS Generation and Energy Efficiency
Source: Research Square preprint supplement (doi:10.21203/rs.3.rs-7422801/v1), 2025-09-04
Supplement: Supplementary file 1 [file 1fc421c886352e247df1b092.docx]

Supplementary Table 1

Analysis variance (ANOVA) for the fitted quadratic polynomial model for optimization of concentration.

| **Source** | **Sum of Squares** | **df** | **Mean Square** | **F-value** | **p-value** |  |
| --- | --- | --- | --- | --- | --- | --- |
| Model | 48683.52 | 9 | 5409.28 | 357.33 | < 0.0001 | significant |
| A-Voltage | 17349.19 | 1 | 17349.19 | 1146.08 | < 0.0001 |  |
| B-NaCl content | 5234.69 | 1 | 5234.69 | 345.80 | < 0.0001 |  |
| C-Time | 4969.55 | 1 | 4969.55 | 328.29 | < 0.0001 |  |
| AB | 172.13 | 1 | 172.13 | 11.37 | 0.0198 |  |
| AC | 440.37 | 1 | 440.37 | 29.09 | 0.0030 |  |
| BC | 440.58 | 1 | 440.58 | 29.10 | 0.0030 |  |
| A² | 8464.80 | 1 | 8464.80 | 559.18 | < 0.0001 |  |
| B² | 7562.93 | 1 | 7562.93 | 499.60 | < 0.0001 |  |
| C² | 7130.64 | 1 | 7130.64 | 471.05 | < 0.0001 |  |
| Residual | 75.69 | 5 | 15.14 |  |  |  |
| Lack of Fit | 20.61 | 3 | 6.87 | 0.2494 | 0.8579 | not significant |
| Pure Error | 55.08 | 2 | 27.54 |  |  |  |
| Cor Total | 48759.21 | 14 |  |  |  |  |
| R2 | 0.9984 |  |  |  |  |  |
| R2Adj | 0.9957 |  |  |  |  |  |
| R2Pre | 0.9907 |  |  |  |  |  |

Supplementary Table 2

Analysis variance (ANOVA) for the fitted quadratic polynomial model for optimization of concentration.

| **Source** | **Sum of Squares** | **df** | **Mean Square** | **F-value** | **p-value** |  |
| --- | --- | --- | --- | --- | --- | --- |
| **Model** | 22.10 | 9 | 2.46 | 90.09 | < 0.0001 | significant |
| A-Voltage | 1.10 | 1 | 1.10 | 40.45 | 0.0014 |  |
| B-NaCl content | 0.5000 | 1 | 0.5000 | 18.34 | 0.0078 |  |
| C-Time | 15.71 | 1 | 15.71 | 576.26 | < 0.0001 |  |
| AB | 0.0256 | 1 | 0.0256 | 0.9392 | 0.3770 |  |
| AC | 1.07 | 1 | 1.07 | 39.30 | 0.0015 |  |
| BC | 0.0100 | 1 | 0.0100 | 0.3669 | 0.5712 |  |
| A² | 0.2254 | 1 | 0.2254 | 8.27 | 0.0348 |  |
| B² | 2.33 | 1 | 2.33 | 85.52 | 0.0002 |  |
| C² | 1.55 | 1 | 1.55 | 56.72 | 0.0007 |  |
| **Residual** | 0.1363 | 5 | 0.0273 |  |  |  |
| Lack of Fit | 0.0638 | 3 | 0.0213 | 0.5872 | 0.6795 | not significant |
| Pure Error | 0.0725 | 2 | 0.0362 |  |  |  |
| **Cor Total** | 22.24 | 14 |  |  |  |  |
| R2 | 0.9939 |  |  |  |  |  |
| R2Adj | 0.9828 |  |  |  |  |  |
| R2Pre | 0.9467 |  |  |  |  |  |

Supplementary Table 3

Analysis variance (ANOVA) for the fitted quadratic polynomial model for optimization of concentration.

| **Source** | **Sum of Squares** | **df** | **Mean Square** | **F-value** | **p-value** |  |
| --- | --- | --- | --- | --- | --- | --- |
| **Model** | 10.43 | 9 | 1.16 | 90.33 | < 0.0001 | significant |
| A-Voltage | 0.3613 | 1 | 0.3613 | 28.15 | 0.0032 |  |
| B-NaCl content | 2.88 | 1 | 2.88 | 224.42 | < 0.0001 |  |
| C-Time | 3.51 | 1 | 3.51 | 273.60 | < 0.0001 |  |
| AB | 0.0625 | 1 | 0.0625 | 4.87 | 0.0784 |  |
| AC | 1.0000 | 1 | 1.0000 | 77.92 | 0.0003 |  |
| BC | 0.1225 | 1 | 0.1225 | 9.55 | 0.0272 |  |
| A² | 1.85 | 1 | 1.85 | 144.36 | < 0.0001 |  |
| B² | 0.1241 | 1 | 0.1241 | 9.67 | 0.0266 |  |
| C² | 0.7756 | 1 | 0.7756 | 60.44 | 0.0006 |  |
| **Residual** | 0.0642 | 5 | 0.0128 |  |  |  |
| Lack of Fit | 0.0175 | 3 | 0.0058 | 0.2500 | 0.8576 | not significant |
| Pure Error | 0.0467 | 2 | 0.0233 |  |  |  |
| **Cor Total** | 10.50 | 14 |  |  |  |  |
| R2 | 0.9939 |  |  |  |  |  |
| R2Adj | 0.9829 |  |  |  |  |  |
| R2Pre | 0.9633 |  |  |  |  |  |

Supplementary Table 4

Analysis variance (ANOVA) for the fitted quadratic polynomial model for optimization of concentration.

| **Source** | **Sum of Squares** | **df** | **Mean Square** | **F-value** | **p-value** |  |
| --- | --- | --- | --- | --- | --- | --- |
| **Model** | 236.37 | 9 | 26.26 | 51.88 | 0.0002 | significant |
| A-Voltage | 21.12 | 1 | 21.12 | 41.73 | 0.0013 |  |
| B-NaCl content | 0.1250 | 1 | 0.1250 | 0.2469 | 0.6403 |  |
| C-Time | 52.53 | 1 | 52.53 | 103.77 | 0.0002 |  |
| AB | 72.25 | 1 | 72.25 | 142.72 | < 0.0001 |  |
| AC | 1.0000 | 1 | 1.0000 | 1.98 | 0.2189 |  |
| BC | 0.5625 | 1 | 0.5625 | 1.11 | 0.3401 |  |
| A² | 74.77 | 1 | 74.77 | 147.69 | < 0.0001 |  |
| B² | 16.67 | 1 | 16.67 | 32.93 | 0.0023 |  |
| C² | 5.77 | 1 | 5.77 | 11.40 | 0.0198 |  |
| **Residual** | 2.53 | 5 | 0.5063 |  |  |  |
| Lack of Fit | 0.9063 | 3 | 0.3021 | 0.3718 | 0.7858 | not significant |
| Pure Error | 1.63 | 2 | 0.8125 |  |  |  |
| **Cor Total** | 238.90 | 14 |  |  |  |  |
| R2 | 0.9894 |  |  |  |  |  |
| R2Adj | 0.9703 |  |  |  |  |  |
| R2Pre | 0.9240 |  |  |  |  |  |
